# Supplementary material for: Diurnally resolved particulate and VOC measurements at a rural site: indication of significant biogenic secondary organic aerosol formation
Source: Copernicus journal article supplement (doi:10.5194/acp-11-5745-2011), 2011-06-21
Supplement: Supplementary file 1 [file acp-11-5745-2011-supplement.pdf]

**Supplementary Information for:**

**Diurnally Resolved Particulate and VOC Measurements at a Rural Site: Indication of  
Significant Biogenic Secondary Organic Aerosol Formation**

S.J. Sjostedt, J. G. Slowik, J. R. Brook, R. Y.-W. Chang, C. Mihele,  
C.A. Stroud, A. Vlasenko, J.P.D. Abbatt

## Supplementary Information from Coincident Aircraft Measurements

During BAQS, a number of flights were conducted by Environment Canada of the National Research Council Twin Otter over the southwestern Ontario region (Hayden et al., 2011). The aircraft was equipped with an Aerodyne C-ToF AMS and with an Aerolaser CO monitor. The average vertical profiles of OA/(CO-80 ppbv) as measured by the aircraft instruments over 12 flights over the region are plotted in Figure S1. It is seen that there is essentially no vertical structure to this quantity when plotted in aggregate, substantiating the use of CO as a tracer. Note that boundary layer heights were roughly between 400 and 2200m, as deduced from potential temperature and water vapour measurements.

Analysis of the only pre-dawn flight gives more specific information. In particular, from 4:15-7:15 on July 3<sup>rd</sup>, data indicate a strong inversion layer, with boundary layer height at ~ 400 m. The OA/(CO-80 ppbv) ratio was  $0.026 \mu\text{g m}^{-3} \text{ppbv}^{-1}$  in the boundary layer and  $0.032 \mu\text{g m}^{-3} \text{ppbv}^{-1}$  above to 1000 m, indicating a slight enhancement of OA/(CO-80 ppbv) in the nocturnal residual layer. Assuming air from this nocturnal residual layer is mixed down into the boundary layer later during the day, we note that the enhancement in OA/(CO-80 ppbv) that would arise is an order of magnitude smaller than the diurnal increase observed in this quantity at Harrow. Unfortunately the data set is limited, but this single case suggests that there is little mixing of excess OA from aloft.

Reference: Hayden, K.L., D.M.L. Sills, J.R. Brook, S.M. Li, P. Makar, M.Z. Markovic, P. Liu, K.G. Anlauf, J.M. O'Brien, Q. Li, and R. McLaren, Aircraft study of the impact of lake-breeze circulations on trace gases and particles during BAQS-Met 2007, Atmos. Chem. Phys. Discuss., accepted, 2011.

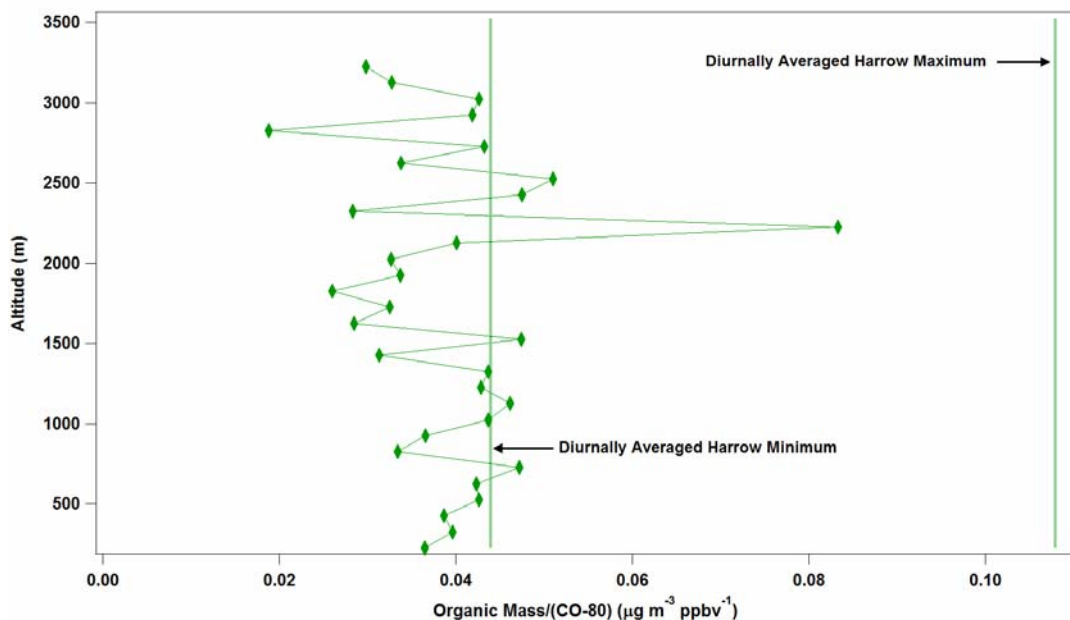

Figure S1: Plot of altitude vs. average levels of OA/(CO- 80 ppbv) for flights around Harrow during BAQS. The vertical lines indicate the indicated quantities as measured at the ground.

Supplementary Information for OH Concentration Diurnal Profile

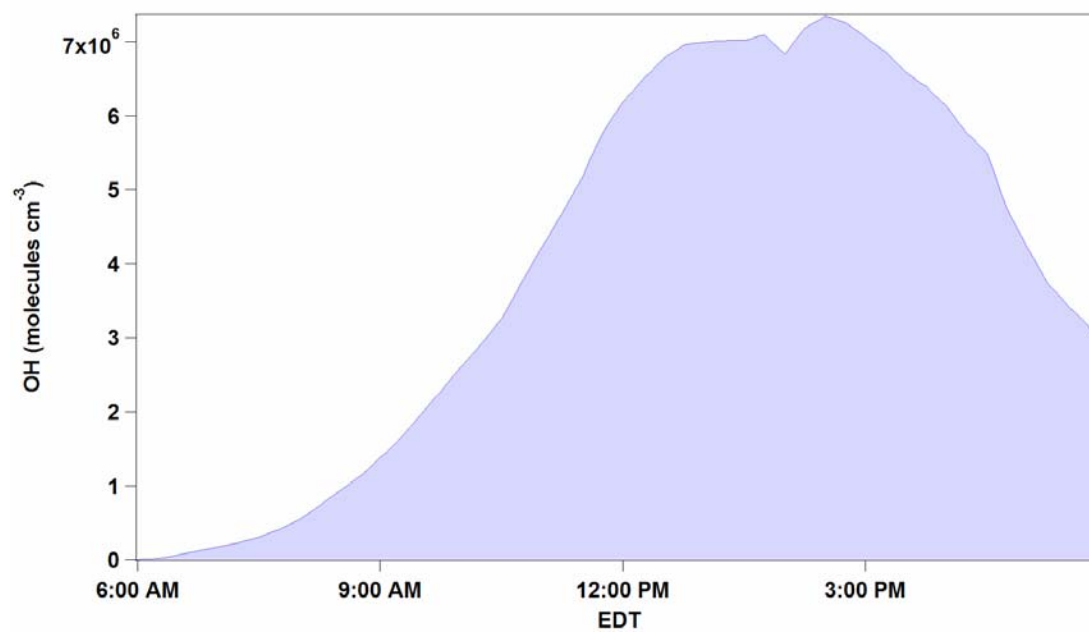

Figure S2. Diurnal profile of OH, as calculated using the approach described in the text.

Supplementary Information for Regional BTEX Values

Table S1: Mixing ratios of benzene as measured during BAQS by canister sampling at Windsor (24 hour samples) and Bear Creek (4 hour samples), and the corresponding mixing ratios for the same time periods at Harrow.

| Date      | Benzene           |                  |                      |                  |
|-----------|-------------------|------------------|----------------------|------------------|
|           | Windsor<br>(pptv) | Harrow<br>(pptv) | Bear Creek<br>(pptv) | Harrow<br>(pptv) |
| 6/23/2007 |                   |                  |                      | 39               |
| 6/24/2007 |                   |                  | 46                   | 140              |
| 6/25/2007 |                   |                  | 44                   | 123              |
| 6/26/2007 |                   |                  | 41                   | 103              |
| 6/27/2007 |                   |                  | 49                   | 91               |
| 6/28/2007 |                   |                  | 54                   | 43               |
| 6/29/2007 | 93                | 78               |                      | 50               |
| 6/30/2007 | 286               | 143              | 33                   | 151              |
| 7/1/2007  |                   |                  | 23                   |                  |
| 7/2/2007  | 143               |                  | 13                   |                  |
| 7/3/2007  | 187               | 47               | 26                   | 35               |
| 7/4/2007  | 312               | 80               | 93                   | 61               |
| 7/5/2007  | 376               | 158              | 61                   | 90               |
| 7/6/2007  | 434               | 227              | 47                   | 299              |
| 7/7/2007  |                   |                  | 108                  | 83               |
| 7/8/2007  |                   |                  | 63                   | 82               |
| 7/9/2007  | 92                | 91               | 51                   | 74               |
| 7/10/2007 | 178               | 107              | 40                   | 89               |

Table S2: Mixing ratios of toluene as measured during BAQS by canister sampling at Windsor (24 hour samples) and Bear Creek (4 hour samples), and the corresponding mixing ratios for the same time periods at Harrow.

| Date      | Toluene           |                  |                      |                  |
|-----------|-------------------|------------------|----------------------|------------------|
|           | Windsor<br>(pptv) | Harrow<br>(pptv) | Bear Creek<br>(pptv) | Harrow<br>(pptv) |
| 6/23/2007 |                   |                  |                      | 44               |
| 6/24/2007 |                   |                  | 41                   | 101              |
| 6/25/2007 |                   |                  | 42                   | 101              |
| 6/26/2007 |                   |                  | 29                   | 135              |
| 6/27/2007 |                   |                  | 79                   | 71               |
| 6/28/2007 |                   |                  | 73                   | 129              |
| 6/29/2007 | 277               | 190              |                      | 96               |
| 6/30/2007 | 1250              | 255              | 24                   | 242              |
| 7/1/2007  |                   |                  | 16                   |                  |
| 7/2/2007  | 751               |                  | 12                   |                  |
| 7/3/2007  | 1130              | 182              | 32                   | 126              |
| 7/4/2007  | 1830              | 169              | 142                  | 98               |
| 7/5/2007  | 1270              | 384              | 61                   | 132              |
| 7/6/2007  | 1200              | 468              | 44                   | 422              |
| 7/7/2007  |                   |                  | 107                  | 51               |
| 7/8/2007  |                   |                  | 77                   | 98               |
| 7/9/2007  | 263               | 111              | 62                   | 57               |
| 7/10/2007 | 349               | 127              | 31                   | 140              |

Table S3: Mixing ratios of C8 aromatics as measured during BAQS by canister sampling at Windsor (24 hour samples) and Bear Creek (4 hour samples), and the corresponding mixing ratios for the same time periods at Harrow.

| C <sub>8</sub> Aromatics |                   |                  |                      |                  |
|--------------------------|-------------------|------------------|----------------------|------------------|
| Date                     | Windsor<br>(pptv) | Harrow<br>(pptv) | Bear Creek<br>(pptv) | Harrow<br>(pptv) |
| 6/23/2007                |                   |                  |                      | 43               |
| 6/24/2007                |                   |                  | 46                   | 108              |
| 6/25/2007                |                   |                  | 23                   | 76               |
| 6/26/2007                |                   |                  | 15                   | 68               |
| 6/27/2007                |                   |                  | 46                   | 87               |
| 6/28/2007                |                   |                  | 33                   | 86               |
| 6/29/2007                | 184               | 149              |                      | 89               |
| 6/30/2007                | 799               | 240              | 23                   | 86               |
| 7/1/2007                 |                   |                  | 12                   |                  |
| 7/2/2007                 | 341               |                  | 12                   |                  |
| 7/3/2007                 | 252               | 66               | 15                   | 54               |
| 7/4/2007                 | 959               | 79               | 53                   | 8                |
| 7/5/2007                 | 781               | 283              | 34                   | 40               |
| 7/6/2007                 | 683               | 364              | 24                   | 199              |
| 7/7/2007                 |                   |                  | 35                   | 9                |
| 7/8/2007                 |                   |                  | 35                   | 53               |
| 7/9/2007                 | 159               | 130              | 24                   | 67               |
| 7/10/2007                | 220               | 136              | 17                   | 61               |

Supplementary Information for Calculations Performed Without CO Normalization

Table S4: Calculated Contributions to Secondary Organic Aerosol Formation for the Full Campaign, not normalized to CO.

|                                   | High NO <sub>x</sub>                     |                             | Low NO <sub>x</sub>                      |                             |
|-----------------------------------|------------------------------------------|-----------------------------|------------------------------------------|-----------------------------|
|                                   | Calculated ΔOrg<br>(μg m <sup>-3</sup> ) | Fraction of<br>Observed (%) | Calculated ΔOrg<br>(μg m <sup>-3</sup> ) | Fraction of<br>Observed (%) |
| Benzene-OH                        | 8.2×10 <sup>-3</sup>                     | 0.4                         | 2.5×10 <sup>-2</sup>                     | 1.3                         |
| Toluene-OH                        | 3.7×10 <sup>-2</sup>                     | 1.9                         | 1.8×10 <sup>-1</sup>                     | 9.0                         |
| C <sub>8</sub> Aromatics-OH       | 4.3×10 <sup>-2</sup>                     | 2.2                         | 3.1×10 <sup>-1</sup>                     | 15.8                        |
| Calculated Total<br>Aromatic ΔOrg | 8.8×10 <sup>-2</sup>                     | 4.4                         | 5.2×10 <sup>-1</sup>                     | 26.0                        |
| Isoprene-OH                       | 7.2×10 <sup>-1</sup>                     | 36.0                        | 6.1×10 <sup>-1</sup>                     | 30.5                        |
| Monoterpenes-OH                   | 5.0×10 <sup>-1</sup>                     | 25.0                        | 1.9                                      | 95.0                        |
| Monoterpenes-O <sub>3</sub>       | 7.3×10 <sup>-1</sup>                     | 36.5                        | 7.3×10 <sup>-1</sup>                     | 36.5                        |
| Calculated Total<br>Biogenic ΔOrg | 2.0                                      | 100.0                       | 3.2                                      | 160.0                       |
| Calculated<br>Total ΔOrg          | 2.1                                      | 105.0                       | 3.7                                      | 185.0                       |
| Measured ΔOrg                     | 2.0 μg m <sup>-3</sup>                   |                             |                                          |                             |

Table S5: Calculated Contributions to Secondary Organic Aerosol Formation for the Detroit Air period, not normalized to CO.

|                                   | High NO <sub>x</sub>                     |                             | Low NO <sub>x</sub>                      |                             |
|-----------------------------------|------------------------------------------|-----------------------------|------------------------------------------|-----------------------------|
|                                   | Calculated ΔOrg<br>(μg m <sup>-3</sup> ) | Fraction of<br>Observed (%) | Calculated ΔOrg<br>(μg m <sup>-3</sup> ) | Fraction of<br>Observed (%) |
| Benzene-OH                        | 4.7×10 <sup>-2</sup>                     | 0.7                         | 9.5×10 <sup>-2</sup>                     | 1.3                         |
| Toluene-OH                        | 2.0×10 <sup>-1</sup>                     | 2.8                         | 7.4×10 <sup>-1</sup>                     | 10.4                        |
| C <sub>8</sub> Aromatics-OH       | 1.9×10 <sup>-1</sup>                     | 2.7                         | 9.9×10 <sup>-1</sup>                     | 14.1                        |
| Calculated Total<br>Aromatic ΔOrg | 4.4×10 <sup>-1</sup>                     | 6.2                         | 1.8                                      | 25.4                        |
| Isoprene-OH                       | 2.0                                      | 28.2                        | 2.7                                      | 38.1                        |
| Monoterpenes-OH                   | 8.7×10 <sup>-1</sup>                     | 8.2                         | 3.2                                      | 14.1                        |
| Monoterpenes-O <sub>3</sub>       | 7.7×10 <sup>-1</sup>                     | 10.9                        | 7.7×10 <sup>-1</sup>                     | 10.9                        |
| Calculated Total<br>Biogenic ΔOrg | 3.6                                      | 50.7                        | 6.7                                      | 94.4                        |
| Calculated<br>Total ΔOrg          | 4.0                                      | 56.3                        | 8.5                                      | 119.7                       |
| Measured ΔOrg                     | 7.1 μg m <sup>-3</sup>                   |                             |                                          |                             |

Table S6: Calculated Contributions to Secondary Organic Aerosol Formation for the Full Campaign less the Detroit Air period, not normalized to CO.

|                                   | High NO <sub>x</sub>                     |                             | Low NO <sub>x</sub>                      |                             |
|-----------------------------------|------------------------------------------|-----------------------------|------------------------------------------|-----------------------------|
|                                   | Calculated ΔOrg<br>(μg m <sup>-3</sup> ) | Fraction of<br>Observed (%) | Calculated ΔOrg<br>(μg m <sup>-3</sup> ) | Fraction of<br>Observed (%) |
| Benzene-OH                        | 4.9×10 <sup>-3</sup>                     | 0.2                         | 1.5×10 <sup>-2</sup>                     | 0.6                         |
| Toluene-OH                        | 2.1×10 <sup>-2</sup>                     | 0.9                         | 1.1×10 <sup>-1</sup>                     | 4.6                         |
| C <sub>8</sub> Aromatics-OH       | 2.7×10 <sup>-2</sup>                     | 1.1                         | 2.0×10 <sup>-1</sup>                     | 8.3                         |
| Calculated Total<br>Aromatic ΔOrg | 5.3×10 <sup>-2</sup>                     | 2.2                         | 3.3×10 <sup>-1</sup>                     | 13.8                        |
| Isoprene-OH                       | 4.1×10 <sup>-1</sup>                     | 17.1                        | 5.0×10 <sup>-1</sup>                     | 20.8                        |
| Monoterpenes-OH                   | 3.6×10 <sup>-1</sup>                     | 15.0                        | 1.7                                      | 70.9                        |
| Monoterpenes-O <sub>3</sub>       | 6.6×10 <sup>-1</sup>                     | 27.5                        | 6.6×10 <sup>-1</sup>                     | 27.5                        |
| Calculated Total<br>Biogenic ΔOrg | 1.4                                      | 58.3                        | 2.9                                      | 120.8                       |
| Calculated<br>Total ΔOrg          | 1.5                                      | 62.5                        | 3.2                                      | 133.3                       |
| Measured ΔOrg                     | 2.4 μg m <sup>-3</sup>                   |                             |                                          |                             |
